1 Title:

2 **A bispecific immunotweezer prevents soluble PrP oligomers and abolishes prion**  
3 **toxicity.**

4

5 Short Title:

6 Neuroprotective bispecific anti-prion antibody

7

8 Authors: Marco Bardelli<sup>1¶</sup>, Karl Frontzek<sup>2¶</sup>, Luca Simonelli<sup>1</sup>, Simone Hornemann<sup>2</sup>, Mattia Pedotti<sup>1</sup>,  
9 Federica Mazzola<sup>1</sup>, Manfredi Carta<sup>2</sup>, Valeria Eckhardt<sup>2</sup>, Rocco D'Antuono<sup>1</sup>, Tommaso Virgilio<sup>1</sup>,  
10 Santiago F. González<sup>1</sup>, Adriano Aguzzi<sup>2\*</sup>, Luca Varani<sup>1\*</sup>

11

12 <sup>1</sup>Institute for Research in Biomedicine, Università della Svizzera italiana, Via Vincenzo Vela 6,  
13 6500 Bellinzona, Switzerland

14 <sup>2</sup>Institute of Neuropathology, University of Zurich, CH-8091 Zurich, Switzerland

15

16 <sup>¶</sup> These authors contributed equally to this work.

17 \* equal contribution, corresponding authors.

18

19

20

## 21 **Abstract**

22 Antibodies to the prion protein, PrP, represent a promising therapeutic approach against prion  
23 diseases but the neurotoxicity of certain anti-PrP antibodies has caused concern. Here we describe  
24 scPOM-bi, a bispecific antibody designed to function as a molecular prion tweezer. scPOM-bi  
25 combines the complementarity-determining regions of the neurotoxic antibody POM1 and the  
26 neuroprotective POM2, which bind the globular domain (GD) and flexible tail (FT) respectively.  
27 We found that scPOM-bi confers protection to prion-infected organotypic cerebellar slices even  
28 when prion pathology is already conspicuous. Moreover, scPOM-bi prevents the formation of  
29 soluble oligomers that correlate with neurotoxic PrP species. Simultaneous targeting of both GD  
30 and FT was more effective than concomitant treatment with the individual molecules or targeting  
31 the tail alone, possibly by preventing the GD from entering a toxic-prone state. We conclude that  
32 simultaneous binding of the GD and flexible tail of PrP results in strong protection from prion  
33 neurotoxicity and may represent a promising strategy for anti-prion immunotherapy.

34

## 35 **Author summary**

36 Antibody immunotherapy is considered a viable strategy against prion disease. We previously  
37 showed that antibodies against the so-called globular domain of Prion Protein (PrP) can cause PrP  
38 dependent neurotoxicity; this does not happen for antibodies against the flexible tail of PrP, which  
39 therefore ought to be preferred for therapy.

40 Here we show that simultaneous targeting of both globular domain and flexible tail by a bispecific,  
41 combination of a toxic and a non-toxic antibody, results in stronger protection against prion  
42 toxicity, even if the bispecific is administered when prion pathology is already conspicuous.

43 We hypothesize that neurotoxicity arises from binding to specific “toxicity triggering sites” in the  
44 globular domain. We designed our bispecific with two aims: i) occupying one such site and

45 preventing prion or other factors from docking to it and ii) binding to the flexible tail to engage the  
46 region of PrP necessary for neurotoxicity.

47 We also show that neurotoxic antibodies cause the formation of soluble PrP oligomers that cause  
48 toxicity on PrP expressing cell lines; these are not formed in the presence of prion protective  
49 antibodies. We suggest that these soluble species might play a role in prion toxicity, similarly to  
50 what is generally agreed to happen in other neurodegenerative disorders.

51

## 52 **Introduction**

53 Prions are the causative agent of sporadic, hereditary and iatrogenic forms of transmissible  
54 spongiform encephalopathies, which afflict humans and broad spectrum of mammals and are  
55 invariably fatal[1-3]. Whereas Bovine Spongiform Encephalopathy (the most prevalent prion  
56 disease in the 1990s, also known as “Mad Cow” disease) has been largely defeated, Chronic  
57 Wasting Disease, which affects deer, elk and moose, remains prominent in parts of the US, Canada,  
58 South Korea and has recently reached Norway[4]. These findings are raising renewed concerns  
59 about the contamination of the food chain. Transmission of infectious animal material to humans  
60 causes variant Creutzfeldt-Jakob disease (vCJD). A common Met/Val polymorphism at codon 129  
61 of the *PRNP* gene is assumed to be important in susceptibility of humans to prion infections, with  
62 homozygous individuals (Met/Met and Val/Val) being overrepresented in collectives of CJD  
63 patients[5]. The recent discovery of a case of vCJD in a 36-year-old man producing both M129 and  
64 V129 variants of PrP, which is much more frequent in the population and is thought to conduce to a  
65 disease developing more slowly, has led to suggestion that we might be facing a new wave of vCJD  
66 cases [6].

67 Human prion diseases continue to be intractable and are poorly understood at the molecular level. It  
68 is firmly established that conversion of cellular prion protein (PrP<sup>C</sup>) into a toxic, self-replicating

69 form (scrapie, PrP<sup>Sc</sup>) leads to the formation of aggregates [2,7]. How such aggregates induce  
70 toxicity, however, is largely unknown.

71 Antibodies against PrP have been proposed as a valid therapeutic strategy against prion diseases,  
72 much like antibodies targeting the amyloid- $\beta$  protein are showing promise in clinical trials against  
73 Alzheimer's disease (AD) [8,9]. Furthermore, anti-PrP antibodies were shown to be protective in  
74 preclinical models of AD [10]. On the other hand, recent literature reports [11] have highlighted  
75 potential safety issues, since an epitope-dependent subset of anti-PrP antibodies have been found to  
76 cause prion mediated neurodegeneration.

77 PrP has a structured globular domain (GD), whose general architecture is highly conserved amongst  
78 mammals, and an unstructured N-terminal region, often referred to as flexible tail (FT). Several  
79 antibodies against the globular domain were shown to elicit neuronal toxicity [11,12]. The exact  
80 epitope on the GD, rather than the binding affinity or other properties, appears to be the main  
81 determinant of toxicity. One such neurotoxic antibody with intriguing properties, POM1, was  
82 extensively characterized [11,13]. POM1 binds with low nanomolar affinity to a discontinuous  
83 epitope comprising the  $\alpha$ 1- $\alpha$ 3 region of the GD. PrP expressing mice and cerebellar organotypic  
84 cultured slices (COCS) exposed to POM1 show rapid neurotoxicity [11]. Intriguingly, toxicity was  
85 prevented by a deletion of the octapeptide repeats in the FT, even if this deletion did not affect the  
86 POM1 epitope. Antibodies against the FT, such as POM2, were also capable of preventing POM1-  
87 mediated toxicity, but only if administered before POM1.

88 POM1 and *bona fide* prions exert similar toxic effects such as neuronal cell loss, astrogliosis,  
89 microgliosis and spongiform change. PrP<sup>Sc</sup>, the proteinase K-resistant form of prion protein, is used  
90 as a surrogate marker for prions and believed to be the infectious agent[14]. In both POM1 and  
91 prions, metabotropic glutamate receptors play an important role in downstream toxicity and  
92 compounds that rescue POM1-induced toxicity also alleviate PrP<sup>Sc</sup>-induced toxicity [15,16].

93 Overall, the observations indicate that antibody binding to specific sites in the globular domain  
94 triggers a toxic process, mediated by the FT, which converges with that initiated by infectious  
95 prions. However, toxic prion antibodies do not generate prion infectivity [17]. The above leads us  
96 to propose that the binding of POM1 to a “toxicity triggering site” might emulate the docking of  
97 PrP<sup>Sc</sup> (or other toxic factors) to the GD. According to this hypothesis, a molecule that occupies the  
98 POM1 binding site in the GD might prove beneficial by preventing interaction with PrP<sup>Sc</sup> and,  
99 consequently, toxicity.

100 Here we designed a bispecific antibody formed by the POM1 variable region, which binds the GD,  
101 and the POM2 variable region, which binds to the FT and was shown to prevent POM1-mediated  
102 toxicity. We show here that the POM1-POM2 bispecific single chain antibody (called scPOM-bi), a  
103 combination of the toxic POM1 and non-toxic POM2 antibodies, is capable of preventing prion  
104 toxicity in COCS even when given 21 days post infection, when signs of prion pathology are  
105 already visible[18]. POM1 forms soluble PrP-containing oligomers that cause toxicity to PrP  
106 expressing cells. By contrast, delivery of scPOM-bi prevents formation of soluble oligomers.  
107 scPOM-bi shows increased protection in comparison to the isolated POM2 or to a mixture of POM1  
108 and POM2, despite having similar binding affinity, suggesting that simultaneous targeting of  
109 globular domain and flexible tail might represent an optimized strategy for immunotherapy of prion  
110 diseases.

111

## 112 **Results**

### 113 **Design of scPOM-bi, a bispecific POM1-POM2 antibody**

114 We fused the toxic antibody POM1 with POM2, capable of preventing its toxicity if administered  
115 before POM1, by joining their variable regions in single chain format with a (GGGGS)<sub>3</sub> linker  
116 commonly utilized in non-natural antibodies [19,20]. We have had considerable success in using  
117 this format to produce bispecific antibodies against various targets. Although the order of the

118 variable fragments and linker size might affect binding and efficacy, computational simulations  
119 showed that the chosen design, with the POM1 moiety preceding POM2 and the chains arranged as  
120 VL-VH-VH-VL, was compatible with binding to PrP. Indeed, the resulting bispecific nanobody,  
121 scPOM-bi, was produced in *E. coli* and characterized to be functional, monomeric and folded with a  
122 melting temperature of 75 °C (S1 Fig.). We did not, therefore, explore the production of alternative  
123 constructs. Computational docking and molecular dynamics simulations, based on the available  
124 experimental structures of POM1 in complex with PrP globular domain [21] and POM2 bound to a  
125 FT derived peptide [22], indicate that the size and orientation of scPOM-bi is compatible with  
126 bivalent engagement of PrP (Fig 1).

127

### 128 **scPOM-bi protects from prion toxicity when administered late after prion infection**

129 When infected with prions, COCS faithfully mimic prion pathology and are easily accessible to  
130 pharmacological manipulation [23]. In contrast to POM1, chronic treatment with scPOM-bi for 21  
131 days did not produce observable toxicity in COCS despite comprising the toxic POM1 moiety (Fig  
132 2A). Furthermore, simultaneous addition of the individuals POM1 and POM2 to COCS resulted in  
133 neurotoxicity, indicating that the bispecific has different properties than the simple sum of its parts.  
134 We added scPOM-bi to COCS from PrP<sup>C</sup>-overexpressing *Tga20* mice infected with either RML6  
135 prions (RML6 = passage 6 of the Rocky Mountain Laboratory strain, mouse-adapted scrapie prions)  
136 or non-infectious brain homogenate (NBH) as a control. 45 days post infection (dpi),  
137 immunohistochemical staining for NeuN, identifying neurons, showed widespread neuronal  
138 degeneration in the presence of RML but not NBH. By contrast, treatment with scPOM-bi  
139 prevented RML-induced neurotoxicity even when administered at 21 dpi (Fig 2B and S2 Fig). The  
140 anti-FT antibody POM2 did not afford similar protection levels at 21 dpi, despite being used at 5-  
141 fold higher molarity than scPOM-bi (Fig 2B) and having comparable binding affinity for PrP (Fig  
142 3). PrP<sup>Sc</sup> levels, detected by proteinase K-digestion of tissue inoculated with RML, remained

143 constant in prion-infected *Tga20* COCS treated with scPOM-bi for 21days (Fig 2C), suggesting that  
144 neuroprotection is not primarily mediated by reduced amounts of PrP<sup>Sc</sup> in RML infected COCS.

145

#### 146 **scPOM-bi binds with high affinity to globular domain and flexible tail of PrP**

147 Surface plasmon resonance (SPR) assays showed that scPOM-bi binds PrP with low nanomolar  
148 affinity, stronger than that of its individual single chain components due to avidity effects, resulting  
149 in slower dissociation, when the two antigen binding sites are engaged (Fig 3). Indeed, scPOM-bi  
150 was found to bind to both a PrP construct lacking the FT and to one lacking the GD with affinity  
151 similar to that of its individual components, scPOM1 and scPOM2 (Fig 3), confirming that both  
152 paratopes of scPOM-bi correctly recognize their cognate epitopes. scPOM-bi avidity can arise from  
153 two binding modes: simultaneous engagement of the GD and FT binding sites on a single PrP  
154 molecule (intramolecular) or binding of the POM1 site on one PrP molecule and the POM2 site on  
155 another (intermolecular). Both options are structurally allowed according to molecular dynamics  
156 simulations (Fig 1). SPR assays performed with different quantities of immobilized PrP indicate  
157 that intermolecular binding is available to scPOM-bi (see S1 Text and S3 Fig. for details).

158

#### 159 **scPOM-bi inhibits the formation of partially PK resistant soluble PrP oligomers**

160 POM1 binds the GD and was shown to have neurotoxic effects mediated by the FT [11]. Soluble  
161 oligomers may be the toxic species responsible for Alzheimer's and other amyloidosis [24-28] and  
162 the smallest infectious unit of prions may also be oligomeric [29]. We thus used dynamic light  
163 scattering (DLS) to compare the aggregation properties of toxic and protective antibodies.

164 Single species of size compatible with the monomeric forms of uncomplexed recombinant mouse  
165 Prion Protein (mPrP) or antibodies were observed by DLS. Addition of the toxic antibody POM1 to  
166 mPrP *in vitro*, instead, caused the formation of soluble oligomers with a radius of approximately  
167 200nm (Fig 4A). As a reference, the monomeric scPOM1:GD complex has an elliptical shape of

168 ~7x5 nm according to the available x-ray structure[13]. The radius value is derived from  
169 interpretation of DLS data using a spherical model which may or may not be appropriate for these  
170 molecules. This, however, does not affect the following qualitative and comparative analysis of the  
171 results.

172 When POM1 was added *in vitro* to a truncated version of mPrP,  $\Delta$ mPrP(residues 90-230), lacking  
173 the N-terminal FT, only monomeric species were found in solution. The disordered region of PrP, in  
174 other words, was required for the formation of POM1-induced soluble aggregates just like POM1-  
175 induced neurotoxicity is abrogated in the absence of the FT. Notably, the soluble oligomers were  
176 also not formed when mPrP was bound by the non-toxic POM2. Upon addition of scPOM-bi to  
177 mPrP, instead, the presence of soluble oligomers are detected at the first observed time point (~5  
178 minutes after complex formation) but these disappear with time (Fig 4A).

179 It was previously shown that POM1-induced toxicity is inhibited by the prior incubation of PrP with  
180 POM2 [15]. Similarly, soluble oligomers were not formed when POM1 was added to a pre-formed  
181 POM2:mPrP complex (Fig 4A). By contrast, addition of POM2 to pre-formed POM1:mPrP  
182 complexes was not capable of preventing toxicity or eliminate the presence of soluble oligomers  
183 (Fig 4A).

184 In contrast to POM2, scPOM-bi was able to eliminate soluble oligomers even when added 5  
185 minutes after the formation of a POM1:mPrP complex, when DLS showed that soluble oligomers  
186 were already present (Fig 4A). The difference was not due to the presence of two binding sites in  
187 scPOM-bi since the bivalent IgG versions of POM1 and POM2 behaved like their single chain  
188 counterpart.

189 Since DLS can only detect the presence of species in solution, we used PAGE/Western blot  
190 quantification to investigate the presence of insoluble aggregates. After formation of the mPrP:Ab  
191 complexes, part of the sample was analyzed with DLS and the remaining was subjected to 5'



192 centrifugation at 20'000 x g . The resulting supernatant was analyzed with PAGE to quantify the  
193 amount of mPrP and Ab present in solution (Fig. 4B). mPrP or antibodies alone neither formed  
194 aggregates over the observed time course (up to 1h, DLS analysis) nor precipitated. When the toxic  
195 POM1 antibody bound mPrP or  $\Delta$ mPrP<sub>90-230</sub>, ~40% of the amount of mPrP and antibody was  
196 detected in the soluble fraction after centrifugation (Fig 4B); however oligomers were not formed  
197 with the truncated form of PrP, which does not cause neurotoxicity when bound to POM1. Similar  
198 levels were detected when POM2 was added after formation of the POM1:PrP complex, which is  
199 known to cause cell toxicity.

200 By contrast, little to no mPrP or antibody was present in solution in the non-toxic combinations  
201 such as the scPOM-bi and POM2 complexes or when POM2 was added before POM1. In contrast  
202 to POM2, however, the bispecific was able to eliminate the POM1 induced soluble oligomers when  
203 added after formation of the POM1:mPrP complex. Again, the difference was not due to the  
204 presence of two binding sites in scPOM-bi since the full IgG versions of POM1 and POM2 behaved  
205 like their single chain counterpart.

206 In order to further characterize oligomers and insoluble aggregates through an independent method  
207 we measured the size of mPrP:Ab complexes by confocal microscopy. Briefly, mPrP and antibody  
208 were mixed in a test tube and, after 20 minutes, analyzed by DLS to characterize the aggregation  
209 state. At that point the material was deposited on microscopy slides without centrifugation or other  
210 clarification steps. The lowest resolvable structure in laser scanning confocal microscopy images in  
211 our experimental settings is diffraction limited at ~120nm. Objects of smaller size are detected as  
212 points but the size and diameter cannot be properly resolved or measured. The toxic POM1:mPrP  
213 complexes formed smaller particles with average area of ~2.5  $\mu\text{m}^2$ . Statistically larger particles with  
214 an average of ~6  $\mu\text{m}^2$  were detected for the non-toxic POM2 and scPOM-bi combinations (Fig 4C).

215 Furthermore, treatment of the mPrP:Ab complexes formed *in vitro* with 2 $\mu$ g/mL of Proteinase K  
216 showed that species resistant to low PK concentrations were more abundant when mPrP was bound  
217 by the toxic POM1 rather than POM2, scPOM-bi or when POM1 bound a PrP construct lacking the  
218 FT (Fig 4D).

219 Overall, the above indicates that protective antibodies prevented the formation of soluble, partially  
220 PK resistant oligomers whose formation requires the FT and is correlated with POM1 induced  
221 neurotoxicity. The protective scPOM-bi bispecific antibody, but not POM2, was capable of  
222 eliminating pre-formed POM1-induced soluble oligomers.

223 In order to test if the POM1-dependent soluble oligomers are indeed toxic, we first formed them *in*  
224 *vitro* by mixing mPrP with the various antibodies and then added the material to CAD5 cells; after  
225 48 hours the cellular toxicity was evaluated with standard propidium iodide staining and FACS  
226 analysis (Fig 5). The scPOM1:mPrP soluble oligomers caused toxicity in PrP<sup>C</sup>-expressing CAD5  
227 cells but not in PrP<sup>C</sup> knock-out (PrP<sup>-/-</sup>) CAD5. No toxicity was detected, instead, when scPOM1  
228 was in complex with the truncated  $\Delta$ mPrP<sub>90-230</sub> lacking the FT. Addition of the scPOM2:mPrP  
229 complex resulted in no toxicity, as well. Intriguingly, addition of the scPOM-bi:mPrP material to  
230 cells 10 minutes after complex formation resulted in toxicity, albeit lower than with scPOM1.

231 However, toxicity was not significant if the material was added 60 minutes after complex  
232 formation. DLS shows that scPOM-bi forms soluble oligomers, much like POM1, in the initial  
233 minutes after complex formation (possibly because some of the bispecific engages mPrP only with  
234 the POM1 moiety, thus acting just like POM1) but these disappear with time. There is, in other  
235 words, correlation between the presence of soluble oligomers and cellular toxicity. By contrast,  
236 addition of the isolated scPOM-bi to CAD5 cells resulted in no toxicity, differently from POM1. A  
237 possible interpretation is that formation of toxic scPOM-bi soluble oligomers requires local high  
238 concentration of mPrP which is available *in vitro* but not in cells.

239

## 240 **Discussion**

241 The discovery that anti-PrP antibodies can block prion pathogenesis *in vivo* [30] has suggested that  
242 such antibodies might be exploited as therapeutics against human prion diseases. However, caution  
243 must be exercised as some antibodies directed against the GD of PrP can trigger PrP-mediated  
244 cellular neurotoxicity in the absence of prions [12,31]. This finding has far-reaching implications,  
245 including the possibility that autoimmunity to PrP may lead to neurodegenerative diseases. At the  
246 molecular level, it suggests that binding to specific sites in the GD can trigger changes in PrP  
247 leading to toxicity.

248 POM1, an antibody binding to the  $\alpha$ 1- $\alpha$ 3 region of the GD, is acutely neurotoxic [11,17,31,32] and  
249 is thought to phenocopy the binding of PrP<sup>Sc</sup> or other factors to a toxicity-triggering site of PrP<sup>C</sup>.  
250 According to this hypothesis, occupation of the POM1 docking site on PrP may be beneficial  
251 against prion diseases. We thus produced a bispecific antibody (termed scPOM-bi) by fusing the  
252 single chain versions of POM1, with the intent of blocking the toxicity triggering site in the GD,  
253 and POM2, which binds the FT and prevents POM1-induced toxicity.

254 Indeed, scPOM-bi not only lacked neurotoxicity, despite containing the toxic POM1 moiety, and in  
255 contrast to simultaneous addition of POM1 and POM2 to COCS, but also protected organotypic  
256 brain cultures from prion-induced neurodegeneration. Neuroprotection was evident even when  
257 scPOM-bi was administered 21 days post infection, when signs of prion pathology were already  
258 evident, suggesting that molecular tweezers may form the basis for a rational therapy of prion and  
259 possibly other neurodegenerative diseases. scPOM-bi afforded stronger neuroprotection than  
260 POM2, suggesting that the concomitant blockade of GD and FT is particularly effective against  
261 prion toxicity.

262 POM1, but not POM2 or scPOM-bi, caused recombinant mPrP to form soluble oligomers resistant  
263 to low concentration of proteinase K. Soluble oligomers were not formed when POM1 bound to an  
264 N-terminally truncated construct lacking the FT,  $\Delta$ mPrP<sub>90-230</sub>. There is a correlation between  
265 oligomer formation and toxicity: neurotoxic antibodies or combinations (such as POM1) formed  
266 soluble oligomers, whereas those that were unable to generate them (such as POM2 or the bispecific  
267 tweezer described here) were innocuous or even protective in *ex vivo* cultured brain slices. Toxicity  
268 was detected when the POM1 induced soluble oligomers were formed in vitro from isolated,  
269 recombinant mPrP and antibody and subsequently added to PrP-expressing CAD5 cells. There was  
270 no toxicity, instead, in knock-out CAD5 lacking PrP or upon addition of the complexes formed by  
271 the protective antibodies. The bispecific is peculiar: soluble oligomers were detected by DLS 10  
272 minutes after formation of the scPOM-bi:mPrP complex, although less abundant than those formed  
273 by POM1. Toxicity, lower than with POM1, was detected upon addition of these species to CAD5  
274 cells. By contrast, DLS showed that scPOM-bi soluble oligomers disappear over time just like  
275 toxicity disappeared if we waited 60 minutes before adding the scPOM-bi:mPrP complex to CAD5  
276 cells. Curiously, no toxicity was detected if scPOM-bi alone was added to CAD5 cells, whereas  
277 POM1 is toxic in this condition. A plausible explanation is that transient, soluble oligomers are only  
278 formed if scPOM-bi and mPrP are both present at high concentration (10 $\mu$ M in our assay), whereas  
279 the local PrP concentration in CAD5 cells is presumably lower. It is also worth noting that  
280 treatment with isolated POM1 causes apparently lower toxicity than treatment with the same  
281 amount of POM1:PrP soluble oligomers, further suggesting that the oligomers are relevant for  
282 toxicity. The above observations indicate that the induction of oligomeric PrP forms may play a role  
283 in POM1 toxicity. Since the antibodies that prevent oligomer formation were protective not only  
284 against POM1 but also against prion infection, we suggest that these soluble oligomers might also  
285 be involved in prion mediated toxicity. This interpretation is in agreement with the conjecture that  
286 soluble aggregates are the primary toxic species driving diverse proteinopathies such as  
287 Alzheimer's and Parkinson's disease. scPOM-bi and other prion protective antibodies may steer PrP

288 from a toxic oligomerization to a non-toxic aggregation pathway. The fact that formation of PK  
289 resistant material is not inhibited by scPOM-bi further corroborates the idea that toxicity, or  
290 protection, is mediated by a different downstream event. There is evidence for similar mechanisms  
291 in alpha-synuclein and A $\beta$ , where non-toxic aggregates of size and conformation different from  
292 those of toxic soluble oligomers were found [33-35]. Distinct tauopathies are linked to different  
293 molecular conformers of aggregated Tau, as well [36]. Furthermore, PrP<sup>Sc</sup> conformers of different  
294 size, compatible with what we observed by DLS, and shape were found in strains with different  
295 properties and infectivity[37,38].

296 The scPOM-bi bispecific antibody, but not POM2, achieved the elimination of existing oligomers  
297 from a solution of pre-formed POM1:mPrP complexes. scPOM-bi was also more effective than  
298 POM2 at blocking prion mediated toxicity. One possibility is that, by bridging across two PrP  
299 molecules, scPOM-bi might favor the elongation of preexisting soluble oligomers, leading to larger,  
300 non-toxic species (Fig 6). However POM2-IgG can also bridge across two PrP molecules and yet it  
301 is less protective than scPOM-bi and cannot eliminate the POM1-induced soluble aggregates  
302 despite comparably high affinity. Engagement of the globular domain appears to be important,  
303 either by inhibiting the binding of other molecules to a toxicity triggering site or by locking PrP GD  
304 in a non-toxic conformation.

305 Indeed, simultaneous targeting of GD and FT by the bispecific antibody described here resulted in  
306 more potent protection, even when given at late timepoints, than simple targeting of the FT. We  
307 conclude that the strategy delineated here may be exploited for the development of effective  
308 immunotherapeutics against prion and possibly other diseases.

309

## 310 **Figure Captions**

311 **Fig. 1: A bispecific immunotweezer formed by a combination of toxic (POM1) and non-toxic**  
312 **(POM2) antibodies.**

313 (A) The single chain variable domains of POM1 and POM2 are joined by a flexible linker to yield  
314 the bispecific scPOM-bi, schematic representation. B) Computational molecular dynamics model of  
315 scPOM-bi in complex with mPrP; intra-molecular (left and S1 movie) and inter-molecular (right  
316 and S2 movie) binding modes are shown. They are both structurally accessible to scPOM-bi.

317

318 **Fig. 2: The bispecific scPOM-bi antibody protects against prion infection even when**  
319 **administered 21 days post infection (dpi).**

320 (A) Chronic treatment with scPOM-bi for 21 days did not produce observable toxicity in COCS,  
321 contrary to POM1. Furthermore, simultaneous addition of the individuals POM1 and POM2 to  
322 COCS resulted in neurotoxicity, indicating that the bispecific has different properties than the  
323 simple sum of its parts Area staining of neuronal nuclei by NeuN is shown on the y axis (lower  
324 values correlate with toxicity). Column 3 (\*) is from a different experiment with a related negative  
325 control on which the data was normalized to. (B) scPOM-bi prevents RML induced neurotoxicity  
326 even when added 21 dpi (top). Despite similar binding affinity for PrP, POM2-IgG does not achieve  
327 similar protection at 21 dpi even at 5 fold higher concentration (bottom). COCS inoculated with  
328 non-infectious brain homogenate (NBH) are used as control; the images show NeuN and DAPI  
329 staining of COCS, scale bar = 500  $\mu$ m. \*\*  $p < 0.01$ , \*\*\*  $p < 0.001$ , n.s. = not significant, one-way  
330 ANOVA with Dunnett's post-hoc test. *Upper panel*:  $n=9$  biological replicates (1 COCS = 1  
331 biological replicate) for all treatment groups except for RML alone ( $n=8$ ). *Lower panel*:  $n=9$   
332 biological replicates for all treatment groups. Images of all biological replicates depicted in S2Fig.  
333 (C) Western blot shows the presence of PK resistant material in COCS inoculated with RML.  
334 Addition of scPOM-bi 21 days after prion inoculation of Tga20 COCS did not show conceivable  
335 reduction of PrP<sup>Sc</sup>.

336

337 **Fig. 3: the bispecific antibody scPOM-bi binds simultaneously to GD and FT of PrP with high**  
338 **affinity.**

339 SPR sensorgrams for binding of scPOM-bi to truncated PrP constructs lacking FT (A) or GD (B)  
340 indicate that both antigen binding sites of scPOM-bi correctly engage their target. The bispecific  
341 antibody (E) had a stronger affinity than its individual components (C-D) due to avidity resulting in  
342 a slower dissociation. The fitting of the experimental data used to calculate the binding constants is  
343 in grey. Values for the above plus the full IgG versions of POM1 and POM2 are summarized in (F).  
344

345 **Fig. 4: scPOM-bi prevents the formation of soluble, PK resistant oligomers.**

346 (A) DLS showed the presence of soluble oligomers (red shades in histograms, reported as  
347 percentage) upon addition of the POM1 toxic antibody to recombinant mPrP *in vitro*. Subsequent  
348 addition of POM2 did not remove the oligomers or inhibit toxicity. Smaller species comparable to  
349 monomeric forms (blue) were detected in solution when POM1 was in complex with  $\Delta$ mPrP<sup>C</sup><sub>90-230</sub>,  
350 lacking the flexible tail, and when POM2 was added to mPrP prior to POM1 addition. Similarly  
351 small species were found when the neuroprotective scPOM-bi was added to mPrP; the bispecific  
352 was also capable of removing the soluble oligomers generated by POM1. DLS data is shown for 3  
353 time points after complex formation. (n=5 for scPOM1:mPrP, scPOM2:mPrP and scPOM-bi:mPrP ;  
354 n=3 for scPOM1:mPrP then scPOM2, scPOM2:mPrP then scPOM1 and scPOM1:mPrP then  
355 scPOM-bi) (B) DLS can only detect soluble material. To investigate the presence of insoluble  
356 aggregates we formed the mPrP:Ab complexes *in vitro*, centrifuged them and analyzed the resulting  
357 supernatant with PAGE/Western blot. Soluble material was only detected in toxic combinations  
358 (POM1:mPrP or POM1:mPrP followed by POM2, red and orange). The percentage of mPrP and  
359 antibody in solution (normalized against isolated PrP or antibody) is shown; data from  
360 quantification of band intensity on SDS-PAGE (images in S5 Fig. – n=7 for all samples tested). (C)  
361 In order to characterize both soluble oligomers and insoluble aggregates we formed the mPrP:Ab  
362 complexes *in vitro* and deposited the resulting material on microscopy slides. Confocal microscopy  
15

363 indicates that toxic antibody combinations (e.g. POM1:mPrP or POM1:mPrP followed by POM2,  
364 red and orange) generate species with smaller average size than protective antibody combinations.  
365 The surface area of the detected species is reported on the y axis, the horizontal line represents the  
366 average. Differences can also be appreciated by visual inspection of the confocal microscopy  
367 images (S4 Fig – scPOM1:mPrP n=166, scPOM2:mPrP n=1136, scPOM-bi:mPrP n=204,  
368 scPOM1:mPrP then scPOM2 n=444, scPOM2:mPrP then scPOM1 n=74 and scPOM1:mPrP then  
369 scPOM-bi n=1767). D) The soluble oligomers generated by POM1 showed increased resistance to  
370 *in vitro* degradation by proteinase K at 2µg/ml (red). Such resistance was abolished when POM1  
371 bound a mPrP construct lacking the FT (light red) or in non-toxic antibodies (shades of blue). Data  
372 from quantification of PK resistant bands on western blot, normalized against isolated PrP (images  
373 in S6 Fig. – scPOM1:mPrP n=5, scPOM1:ΔPrP n=3, scPOM2:mPrP n=4, scPOM-bi:mPrP n=4).

374

375 **Fig. 5: scPOM-bi does not induce toxicity on CAD5 expressing PrPC in comparison to**  
376 **scPOM1**

377 The percentage of PI positive cells for different mPrP:antibodies complexes (A) or antibodies alone  
378 (B) on CAD5 PrP<sup>C</sup> (left) and on CAD5 Prnp<sup>-/-</sup> (right) are shown; each sample was added to cells  
379 after 10' or 60' of incubation at RT. The scPOM1:mPrP soluble oligomers caused toxicity in PrP<sup>C</sup>-  
380 expressing CAD5 cells but not in PrP<sup>C</sup> knock-out (PrP<sup>-/-</sup>) CAD5. No toxicity was detected when  
381 scPOM1 was in complex with the truncated ΔmPrP<sub>90-230</sub> lacking the FT. Addition of the  
382 scPOM2:mPrP complex resulted in no toxicity, as well. Addition of the scPOM-bi:mPrP material to  
383 cells 10 minutes after complex formation resulted in toxicity, albeit lower than with scPOM1.  
384 However, toxicity was not significant if the material was added 60 minutes after complex  
385 formation. (n=4 for all samples tested).

386



387 **Fig. 6: The bispecific antibody scPOM-bi prevents the formation of soluble PrP oligomers and**  
388 **protects from prion neurotoxicity even when administered late after infection.**

389 Addition of POM1 antibody (top), but not POM2 or scPOM-bi, to PrP<sup>C</sup> generates soluble, pK  
390 resistant PrP oligomers (red) whose presence correlates with toxicity (top); subsequent addition of  
391 the neuroprotective scPOM-bi, but not POM2, eliminates them in favor of larger, non-toxic  
392 aggregates (blue). Small soluble oligomers might also be responsible for prion induced toxicity  
393 (bottom) similarly to other amyloidosis. scPOM-bi might be able to eliminate them just as it does  
394 with the POM1-induced oligomers whereas POM2 might not, which would explain why only the  
395 bispecific is neuroprotective even at late administration (21 days post infection, dpi).

396

## 397 **Materials and Methods:**

### 398 **Cerebellar organotypic slice cultures (COCS)**

399 Preparation of COCS was undertaken as described elsewhere [39]. Briefly, 350 µm thick COCS  
400 were prepared from 9-12 day old Tga20 or ZH3 pups [40]. Inoculation of COCS was performed  
401 with 100 µg brain homogenate per 10 slices from terminally sick prion-infected (RML6) or NBH  
402 from CD1 mice, diluted in 2 mL physiological Grey's balanced salt solution [41]. The infectious  
403 brain homogenate was added to the free-floating COCS for 1 h at 4°C then washed, and 5–10 slices  
404 were placed on a 6-well PTFE membrane insert. Antibodies were first added 1, 10 or 21 days post-  
405 infection then re-added with every medium change (three times a week).

406

### 407 **CAD5 PrP<sup>C</sup> and Prnp<sup>-/-</sup>**

408 In order to assess PrP<sup>C</sup>-dependent toxicity of the soluble oligomers *in vitro* we generated *Prnp*  
409 knock-out versions (*Prnp*<sup>-/-</sup>) of the murine neuroblastoma cell line CAD5 by CRISPR/Cas9. CAD5  
410 is a subclone of the central nervous system catecholaminergic cell line CAD showing particular  
411 susceptibility to prion infection [38,42]. To avoid expression of aberrant or truncated versions of

412 PrP<sup>C</sup> or deletion of the splice acceptor site that would lead to pathological overexpression of Doppel  
413 (Dpl) mRNA [43], we used single-stranded guide RNA (sgRNA) cloned into the MLM3636  
414 plasmid aiming at a protospacer adjacent motif (PAM) site in the signal peptide of *Prnp* (S7A Fig.).  
415 Cells were co-transfected with MLM3636 and the hCas9 plasmid followed by transient antibiotic  
416 selection.  
417 Subsequently, 7 clones were manually picked, expanded and subjected to further characterization.  
418 Cells were lysed and PrP<sup>C</sup> levels were measured by POM1/POM2 sandwich ELISA. Herein, 7  
419 CAD5 *Prnp*<sup>-/-</sup> candidate clones #A6, #C2, #C6, #C12, #H7, #H9 and #H12 all showed near-zero  
420 PrP<sup>C</sup> levels comparable to the established *Prnp*<sup>-/-</sup> cell line HPL (p>0.05, one-way ANOVA with  
421 Dunnett's post-hoc test, S7B Fig.) [44]. 5 clones were further assessed on western blot, where no  
422 detectable PrP<sup>C</sup> levels could be observed (S7C Fig.), suggesting a successful knock-out of PrP<sup>C</sup> in  
423 all 5 *Prnp*<sup>-/-</sup> candidate clones. DNA was extracted from expanded cells of clones #C2 and #C12 and  
424 the mutagenized region was sequenced by PCR amplification of the open reading frame (ORF) of  
425 *Prnp*. Amplified products were cloned into the pCR-Blunt II-TOPO plasmid (Invitrogen) and 10  
426 colonies per clone were sequenced by Sanger sequencing. Herein, #C2 showed four different  
427 mutations, i.e., three deletions and one insertion, while #C12 showed two different deletions  
428 proximal to the PAM (S7D Fig.). These results indicate multiploidy to be more likely in #C2 than in  
429 #C12, hence all further experiments are performed with the CAD5 *Prnp*<sup>-/-</sup> clone #C12.

430 For CRISPR/Cas9-aided generation of CAD5 knock-out cells, mouse *Prnp* sgRNA was designed  
431 using the web-based tools <http://crispr.mit.edu/> and  
432 <http://zifit.partners.org/ZiFiT/CSquare9GetOligos.aspx> (last access on May 15<sup>th</sup> 2017). The sgRNA  
433 expression plasmid MLM3636 was a gift from Keith Joung (Addgene plasmid # 43860,  
434 [www.addgene.org](http://www.addgene.org)). For annealing of single-stranded DNA oligomers of sgRNA for subsequent  
435 cloning into the MLM3636 plasmid the following ligation reaction was prepared: 10 µl Oligo4 F  
436 [100 µM] (5' - ACA CCG CAG TCA TCA TGG CGA ACC TG - 3'), 10 µl Oligo4 R [100 µM] (5'

437 - AAA ACA GGT TCG CCA TGA TGA CTG CG - 3'), 10  $\mu$ L of NEB Buffer 2.1 (New England  
438 Biolabs), 70  $\mu$ l ddH<sub>2</sub>O. Reaction mix was heated for 4 min at 95°C on a heating block ThermoStat  
439 (Eppendorf), then the heating block was turned off and the reaction was allowed to proceed for 30  
440 min on the block and was then put at 4°C. Golden Gate assembly [45] was used in order to clone

| <i>amount</i> | <i>name</i>                                |
|---------------|--------------------------------------------|
| 150 ng        | MLM3636 plasmid                            |
| 1 $\mu$ l     | double-stranded oligomer ligation mix      |
| 2 $\mu$ l     | NEB T4 ligase buffer (New England Biolabs) |
| 13.25 $\mu$ l | ddH <sub>2</sub> O                         |
| 1 $\mu$ l     | Esp3I (New England Biolabs)                |
| 1 $\mu$ l     | T4 ligase (New England Biolabs)            |

441 the double-stranded DNA Oligomers into the MLM3636 plasmid, using the following reaction:

442

443 This reaction was put on a thermocycler using the following conditions:

| <i>temperature</i> | <i>duration</i> | <i>cycles</i> |
|--------------------|-----------------|---------------|
| 37°C               | 5 min           | 10 x          |
| 16°C               | 10 min          |               |
| 37°C               | 15 min          |               |
| 80°C               | 5 min           |               |

444 The ligated plasmid MLM3636(sgRNA<sub>mPmp</sub>) was subsequently transformed into DH5 $\alpha$  chemically  
445 competent *E. coli* cells (Invitrogen) and plasmid purification was undertaken using Plasmid Maxi  
446 Kit (Qiagen). CAD5 cells were co-transfected using the MLM3636(sgRNA<sub>mPmp</sub>) plasmid and the  
447 hCas9 plasmid (hCas9 was a gift from George Church, Addgene plasmid # 41815, [46]) dissolved  
448 in Lipofectamine 2000 (Invitrogen). After selection of transfected cells with Geneticin (Invitrogen),

449 single colonies were picked and expanded. For sequencing, DNA was extracted from cells using  
450 DNeasy Blood & Tissue Kit (Qiagen). PCR amplification with Q5 high-fidelity DNA polymerase  
451 was undertaken using the primers Prn-ko F1 (5' - TGC AGG TGA CTT TCT GCA TTC TGG - 3')  
452 and P10 rev (5' - GCT GGG CTT GTT CCA CTG ATT ATG GGT AC - 3'). After PCR clean-up  
453 using NucleoSpin Gel and PCR Clean-up kit (Macherey-Nagel), blunt-end PCR fragments were  
454 cloned into Zero Blunt TOPO PCR Cloning Kit (Thermo Fisher Scientific) and Sanger Sequencing  
455 (Microsynth) was performed to identify mutated *Prnp* sequences. Western Blot and ELISA was  
456 undertaken to confirm *Prnp*<sup>-/-</sup> as described below. Unless mentioned otherwise, clone #C12 was  
457 used for all experiments.

458

#### 459 **Enzyme-linked immunosorbent assay (ELISA)**

460 For measuring PrP<sup>C</sup> levels from cell lysates, ELISA was performed as described previously [32].  
461 Herein, 96-well MaxiSorp polystyrene plates (Nunc) were coated with 400 ng/ml POM1 (or  
462 POM19) in PBS at 4°C overnight. Plates were washed three times in PBS + 0.1% Tween-20 (0.1%  
463 PBS-T) and blocked with 80 µl per well of 5% skim milk in 0.1% PBS-T for 1.5 h at room  
464 temperature. Blocking buffer was discarded and samples and controls were added dissolved in 1%  
465 skim milk in 0.1% PBS-T for 1 h at 37°C. Recombinant, full-length murine PrP<sup>C</sup> (rmPrP<sub>23-230</sub>) was  
466 used as positive control, 0.1% PBS-T was used as negative control. Biotinylated POM2 was used to  
467 detect PrP<sup>C</sup> (200 ng/ml in 1% skim milk in 0.1% PBS-T).

468

#### 469 **CAD5 toxicity assay**

470 Quantification of toxicity on CAD5 either expressing or lacking PrP<sup>C</sup> induced by different  
471 antibodies alone or in complex with mPrP/ΔmPrP(90-230) was measured as percentage of PI  
472 positive cells using Flow Cytometry.

473 CAD5 PrP<sup>C</sup> or Prnp<sup>-/-</sup> were cultured with 20mL Corning™ Basal Cell Culture Liquid Media -  
474 DMEM and Ham's F-12, 50/50 Mix supplemented with 10% FBS, Gibco™ MEM Non-Essential  
475 Amino Acids Solution 1X, Gibco™ GlutaMAX™ Supplement 1X and 0,5mg/mL of Geneticin in  
476 T75 Flasks ThermoFisher™ at 37°C 5% CO<sub>2</sub>. 16 hours before treatment, cells were splitted into  
477 96wells plates at 25000cells/well in 100µL.  
478 Complexes of PrP:Antibodies (1:1 PrP:Ab ratio for monovalent binding, 2:1 PrP:Ab ratio for  
479 bivalent binding) or antibodies alone were formed at 5µM final concentration, in 20mM HEPES pH  
480 7,2 150mM NaCl. After 10' or 60' upon complex formation, 100µL of each sample, including  
481 buffer alone or unrelated antibodies as controls, were added to CAD5 cells, in duplicates.  
482 After 48 hours, cells were washed two times with 100µL MACS buffer (PBS + 1% FBS + 2mM  
483 EDTA) and resuspended in 100µL MACS buffer. 30'' before FACS measurements PI (1µg/mL) was  
484 added to cells. Measurements were performed using BD™ LSRFORTESSA  
485 Statistics: percentage of PI positive cells were plotted in columns as mean with SD. 2way ANOVA  
486 test with Tukey test was performed comparing each samples (\* p<0.05, \*\* p<0.005, \*\*\* p<0.0005,  
487 \*\*\*\* p<0.00001)

488

#### 489 **Immunohistochemical stainings and NeuN morphometry**

490 45 days post infection, prior to fixation, COCS were rinsed twice in PBS, fixed in 4%  
491 paraformaldehyde for 2 days at 4°C, washed twice in PBS and incubated in blocking buffer (0.05%  
492 Triton X-100 vol/vol, 0.3% goat serum vol/vol in PBS) for 1 hour at room temperature. NeuN  
493 stainings were performed for 3 days at 4°C with an Alexa-488 conjugated mouse anti-NeuN  
494 antibody (Life Technologies) at 1.6 µg/mL in blocking buffer and incubated. After washing for 15  
495 min in PBS, cell nuclei were made visible by a 30 min incubation with DAPI (1 µg/mL) in PBS at  
496 room temperature. Slices were then washed again twice in PBS for 15 minutes and mounted with  
497 fluorescent mounting medium (DAKO) on a glass slide. NeuN morphometry of COCS was  
498 undertaken on images taken on a fluorescent microscope (BX-61, Olympus) at identical exposure

499 times through custom written scripts for the image analysis software cell<sup>^</sup>P (Olympus) as  
500 previously described [11].

501

#### 502 **Proteinase K digestion (COCS)**

503 COCS were washed twice in PBS and scraped off the slice culture membrane using 10  $\mu$ L PBS per  
504 slice. Slice cultures were homogenized using a TissueLyser LT (Qiagen) small bead mill at 50 Hz  
505 for 2 minutes. For determination of PrP<sup>Sc</sup>, RML6 (1  $\mu$ l of 10% w/v brain homogenate or 2  $\mu$ g  
506 protein per lane) and slice culture homogenates (20  $\mu$ g protein per lane) of *Tga20* COCS were  
507 digested with 25  $\mu$ g mL<sup>-1</sup> proteinase K (Roche) at a final volume of 20  $\mu$ L in PBS for 30 minutes at  
508 37°C. For inactivation of proteinase K, 7  $\mu$ L of 4x NuPAGE LDS sample buffer (Thermo Fisher  
509 Scientific) was added and samples were boiled at 95°C for 5 minutes. Equal sample volumes were  
510 loaded on Nu-PAGE Bis/Tris precast gels (Life Technologies) and Western blotting was performed  
511 using the monoclonal anti-PrP antibody POM1 as described elsewhere[32].

512

513

#### 514 **Computational Modelling and Molecular Dynamics of scPOM-bi**

515 The structure of scPOM-bi used in the computational simulations was modeled on the experimental  
516 structures of the POM1:PrP<sub>124-225</sub> complex (PDB code 4H88) and POM2:octarepeat-peptide (PDB  
517 code: 4J8R) complexes. After initial superposition of the POM1 and POM2 moiety on the structure  
518 of one (for intramolecular binding models) or two (for intermolecular binding models) PrP  
519 molecules, the linker joining the two scFv was manually built. The system was then subjected to  
520 100ns of fully atomistic molecular dynamics simulations (MD) to obtain an energetically favorable  
521 and stable conformation.

522 In all cases, the system was initially set up and equilibrated through standard MD protocols:

523 proteins were centered in a triclinic box, 0.2nm from the edge, filled with SPCE water model and

524 0.15M Na<sup>+</sup>Cl<sup>-</sup> ions using the AMBER99SB-ILDN protein force field. Energy minimization was  
525 performed in order to let the ions achieve a stable conformation. Temperature and pressure  
526 equilibration steps, respectively at 298°K and 1 Bar, of 100ps each were then performed before  
527 performing 300ns molecular dynamics simulations with the above mentioned force field. MD  
528 trajectory files were analyzed after removal of Periodic Boundary Conditions. The stability of each  
529 simulated complex was verified by root mean square deviation, radius of gyration and visual  
530 analysis.

531

### 532 **Protein production**

533 Recombinant mouse PrP full length (23-230), PrP lacking FT (90-230), globular domain only (120-  
534 230) or Flexible tail only (23-120) were expressed and purified from *E.coli* as previously  
535 described[47,48].

536 scPOM1, scPOM2 and scPOM-bi sequences were codon optimized, cloned in frame into a pET21a  
537 plasmid (Novagen) and expressed in *E.coli* Rosetta (scPOM-bi) or Rosetta pLysS (for scPOM1 and  
538 scPOM2) cells. Bacterial cells were grown in 2XYT media plus Ampicillin (100µg/mL) and  
539 chloramphenicol (34µg/mL) at 25°C (scPOM1 and scPOM2) or 37°C (scPOM-bi) until OD600  
540 reached 0.6, then induced with 0.5mM IPTG and harvested 16 (scPOM1 and scPOM2) or 3  
541 (scPOM-bi) hours post-induction. Bacterial pellets were sonicated with 50mM MES pH6.5 100mM  
542 NaCl and 0.5mM DTT (50mL per liter of culture) and centrifuged at 16500rpm (rotor ss34) for 30'  
543 at 4°C. The pellet was then washed with sonication buffer plus 0.5% of Triton-X100 and then with  
544 sonication buffer to remove excess of Triton-X100. The pellet was solubilized in 50mM MES pH  
545 6.5 1M NaCl 6M Guanidine-HCl (Buffer A). Following addition of 0.2% PEI and centrifugation to  
546 remove DNA contamination, 60% ammonium sulfate was added to the supernatant to remove traces  
547 of PEI. After centrifugation the pellet was resuspended in Buffer A, filtered and loaded on pre-  
548 equilibrated HisTrap Column (GE healthcare) with Buffer A. The column was washed with at least

549 5 volumes of Buffer A and eluted with Buffer A plus 500mM Imidazole. Antibody containing  
550 fractions were diluted 20 times into refolding buffer (20 mM phosphate buffer pH 10.5, 100 mM  
551 NaCl, 200 mM arginine, 1mM Glutathione Reduced and 0.1mM Glutathione Oxidized). scPOM1,  
552 scPOM2 and scPOM-bi were finally purified on a Superdex-75 size exclusion column (GE) in PBS  
553 buffer. The elution and dynamic light scattering profiles of all proteins were consistent with  
554 monomeric species. Full IgG POM1 and POM2 monoclonal antibodies were produced and purified  
555 as described previously[32].

556

### 557 **SPR binding assays**

558 The binding properties of the complexes between scPOM1, scPOM2, either in single chain or IgG  
559 version, and scPOM-bi on different mPrP constructs were analyzed at 25°C on a ProteOn XPR-36  
560 instrument (Bio-Rad) using 20mM HEPES pH 7.2 150mM NaCl 3mM EDTA and 0.005% Tween-  
561 20 as running buffer. 50nM solutions of PrP constructs were immobilized on the surface of a GLC  
562 sensor chip through standard amine coupling. Serial dilution of antibodies in the nanomolar range  
563 were injected at a flow rate of 100  $\mu$ L/min (contact time 6 minutes); dissociation was followed for 5  
564 minutes. Analyte responses were corrected for unspecific binding and buffer responses by  
565 subtracting the signal of both a channel were no PrP was immobilized and a channel were no  
566 antibody was added. Curve fitting and data analysis were performed with Bio-Rad ProteOn  
567 Manager software (version 3.1.0.6). In the PrP dilution experiments used to evaluate avidity effects,  
568 serial dilution (1:100, 1:200, 1:500 and 1:1000) of NHS/EDAC compounds were used for GLC chip  
569 surface activation in order to limit the amount of immobilized protein.

570

### 571 **Dynamic Light Scattering (DLS) assays**

572 The size of PrP either alone or in complex with different antibodies was estimated by Dynamic  
573 Light Scattering (DLS) at 25°C using a “DynaPro - NanoStar” instrument (WYATT) in 10 $\mu$ L at a  
574 concentration of 5 $\mu$ M. The PrP:antibody ratio was 1:1 for monovalent binding (e.g. scF<sub>v</sub>) and 2:1



575 for bivalent binding species (e.g. full IgG). Readings were taken 2, 5, 10, 20 and 30 minutes after  
576 complex formation. When evaluating addition of a second antibody (e.g. forming a PrP/scPOM1  
577 complex and then adding scPOM-bi), PrP and the first antibody were pre-mixed for 5 minutes and  
578 then the second antibody was added. Each time point measurement was performed by 10 repetitions  
579 of 5 seconds signal integration. A Rayleigh sphere model was used for size estimation. At least 3  
580 repetitions of the same experiment were performed on different, freshly prepared samples. Before  
581 complex formation, all samples were dialyzed together in 20mM HEPES pH 7.2 150mM NaCl,  
582 centrifuged at 21000g and filtered with 0.22 $\mu$ m filters before measurement. Statistics: all  
583 experiments are shown as mean with standard error of the mean (SEM).

584

#### 585 **Precipitation assays**

586 Quantification of soluble PrP either alone or in complex with different antibodies was performed  
587 using SDS-PAGE and either comassie staining (for PrP alone and in complex with scFv) or western  
588 blot (for PrP/IgG complexes). The precipitation assays were run in parallel to DLS assays in the  
589 conditions indicated above. Samples were centrifuged for 2 minutes at 21000g at 4°C. 25 $\mu$ L of  
590 supernatant was collected, mixed with equal volume of sample buffer and loaded on polyacrylamide  
591 gel (4% Stacking – 12% running). For comassie staining, SDS-PAGES were left 10 minutes in  
592 2.5g/L Comassie Brilliant Blue G-250 (Sigma) 40% Methanol and 10% Glacial Acetic Acid and  
593 then destained using 70% ddH<sub>2</sub>O, 20% Methanol and 10% Glacial Acetic Acid for 1hour at least.  
594 Gels were then acquired using ImageQuant LAS 4000 (GE Healthcare) according to standard  
595 procedures. For western blot, proteins from SDS-PAGE were transferred onto PVDF membranes,  
596 blocked in TBS-Tween20 10% Milk for 10 minutes at RT and probed with an antibody against PrP  
597 (POM19 mouse IgG 1 $\mu$ g/mL in TBS-Tween20 for 16 hours at 4°C) that does not compete with  
598 either scPOM1, scPOM2 and scPOM-bi. The primary antibody was detected using a goat anti-  
599 Mouse-HRP conjugated antibody (1:10000 in TBS-Tween20 for 1hour at RT, from ThermoFisher)  
600 and developed using Pierce™ ECL Western Blotting Substrate (ThermoFisher).

601 Chemiluminescence from PrP specific bands were acquired using a ImageQuant LAS 4000 (GE  
602 Healthcare) using High Resolution for sensitivity, 1/60 or 1/100 sec exposure time and Precision as  
603 exposure type. Quantification of PrP was then performed using Multi Gauge Software (from  
604 FujiFilm) with standard protocol, normalizing all samples to PrP Alone control bands. At least 3  
605 independent replicates of the experiments were performed. Statistics: all experiments are shown as  
606 mean with SEM.

607

### 608 **Confocal analyses of PrP/Ab Oligomers**

609 Antibodies were labelled with Alexa Fluor™ 647 NHS Ester (Thermo Fisher Scientific) in PBS  
610 carbonate pH 8.3 with a 1:2 Ab:Dye ratio; unbound dyes were removed using Size Exclusion  
611 Chromatography. Complexes between mPrP and Abs were generated at 5µM in 10µL with 1:1 ratio  
612 for monovalent binding (e.g. scF<sub>v</sub>) and 2:1 for bivalent binding species (e.g. POM-bi) as for DLS  
613 assays. After 10' of incubation at 25C, 2µL of each complex was added to glass microscopy slides  
614 (Thermo Fisher Scientific) and covered with coverslip. The same samples were also subjected to  
615 DLS analyses, in parallel. Images were acquired using a Leica TCS SP5 confocal microscope using  
616 sequential acquisition settings to visualize aggregates containing labelled antibodies. For each  
617 mPrP:Ab complex, 4 fields of view of 246 µm x 246 µm were acquired with a 63X/1.4 NA oil  
618 immersion objective. Images were analysed using IMARIS software (Bitplane). To estimate  
619 particles size surfaces were generated in software based on the fluorescent signal from Alexa647  
620 dye (segmentation parameters: surface grain size 0.01 µm, intensity threshold set at 50). Statistics:  
621 all particles were shown in dot plot graph as mean with SD. Mann-Whitney test was performed (\*  
622 p<0.05, \*\* p<0.01, \*\*\* p<0.001, \*\*\*\* p<0.0001)

623

### 624 **Ethics Statement**

625 All animal experiments were conducted in strict accordance with the Rules and Regulations for the  
626 Protection of Animal Rights (Tierschutzgesetz and Tierschutzverordnung) of the Swiss Bundesamt

627 für Lebensmittelsicherheit und Veterinärwesen BLV. Body weights were measured weekly. All  
628 animal protocols and experiments performed were specifically approved for this study by the  
629 responsible institutional animal care committee, namely the Animal Welfare Committee of the  
630 Canton of Zürich (permit numbers Versuchstierhaltung 123, ZH139/16 and 90/2013). All efforts  
631 were made to minimize animal discomfort and suffering.

## 632 **Acknowledgments**

633 We thank Robyn Grace Holden for graphic assistance and Diego Morone for microscope technical  
634 support.

635

636 **References:**

637

- 638 1. Aguzzi A, Sigurdson C, Heikenwaelder M (2008) Molecular mechanisms of prion pathogenesis.  
639 *Annu Rev Pathol* 3: 11-40.
- 640 2. Aguzzi A, Calella AM (2009) Prions: protein aggregation and infectious diseases. *Physiol Rev*  
641 89: 1105-1152.
- 642 3. Aguzzi A, Lakkaraju AK (2016) Cell Biology of Prions and Prionoids: A Status Report. *Trends*  
643 *Cell Biol* 26: 40-51.
- 644 4. Waddell L, Greig J, Mascarenhas M, Otten A, Corrin T, et al. (2018) Current evidence on the  
645 transmissibility of chronic wasting disease prions to humans-A systematic review.  
646 *Transbound Emerg Dis* 65: 37-49.
- 647 5. Dyrbye H, Broholm H, Dziegiel MH, Laursen H (2008) The M129V polymorphism of codon 129  
648 in the prion gene (PRNP) in the Danish population. *Eur J Epidemiol* 23: 23-27.
- 649 6. Mok T, Jaunmuktane Z, Joiner S, Campbell T, Morgan C, et al. (2017) Variant Creutzfeldt-Jakob  
650 Disease in a Patient with Heterozygosity at PRNP Codon 129. *N Engl J Med* 376: 292-294.
- 651 7. Aguzzi A, Polymenidou M (2004) Mammalian prion biology: one century of evolving concepts.  
652 *Cell* 116: 313-327.
- 653 8. Reardon S (2015) Antibody drugs for Alzheimer's show glimmers of promise. *Nature* 523: 509-  
654 510.
- 655 9. Sevigny J, Chiao P, Bussiere T, Weinreb PH, Williams L, et al. (2016) The antibody aducanumab  
656 reduces Abeta plaques in Alzheimer's disease. *Nature* 537: 50-56.
- 657 10. Chung E, Ji Y, Sun Y, Kascsak RJ, Kascsak RB, et al. (2010) Anti-PrPC monoclonal antibody  
658 infusion as a novel treatment for cognitive deficits in an Alzheimer's disease model mouse.  
659 *BMC Neurosci* 11: 130.
- 660 11. Sonati T, Reimann RR, Falsig J, Baral PK, O'Connor T, et al. (2013) The toxicity of antiprion  
661 antibodies is mediated by the flexible tail of the prion protein. *Nature* 501: 102-106.
- 662 12. Solforosi L, Criado JR, McGavern DB, Wirz S, Sanchez-Alavez M, et al. (2004) Cross-linking  
663 cellular prion protein triggers neuronal apoptosis in vivo. *Science* 303: 1514-1516.
- 664 13. Baral PK, Wieland B, Swayampakula M, Polymenidou M, Rahman MH, et al. (2012) Structural  
665 studies on the folded domain of the human prion protein bound to the Fab fragment of the  
666 antibody POM1. *Acta Crystallogr D Biol Crystallogr* 68: 1501-1512.
- 667 14. Aguzzi A, Weissmann C (1997) Prion research: the next frontiers. *Nature* 389: 795-798.
- 668 15. Herrmann US, Sonati T, Falsig J, Reimann RR, Dametto P, et al. (2015) Prion infections and  
669 anti-PrP antibodies trigger converging neurotoxic pathways. *PLoS Pathog* 11: e1004662.
- 670 16. Goniotaki D, Lakkaraju AKK, Shrivastava AN, Bakirci P, Sorce S, et al. (2017) Inhibition of  
671 group-I metabotropic glutamate receptors protects against prion toxicity. *PLoS Pathog* 13:  
672 e1006733.
- 673 17. Frontzek K, Pfammatter M, Sorce S, Senatore A, Schwarz P, et al. (2016) Neurotoxic  
674 Antibodies against the Prion Protein Do Not Trigger Prion Replication. *PLoS One* 11:  
675 e0163601.
- 676 18. Falsig J, Julius C, Margalith I, Schwarz P, Heppner FL, et al. (2008) A versatile prion  
677 replication assay in organotypic brain slices. *Nat Neurosci* 11: 109-117.
- 678 19. Brinkmann U, Kontermann RE (2017) The making of bispecific antibodies. *MAbs* 9: 182-212.
- 679 20. Mack M, Riethmuller G, Kufer P (1995) A small bispecific antibody construct expressed as a  
680 functional single-chain molecule with high tumor cell cytotoxicity. *Proc Natl Acad Sci U S*  
681 *A* 92: 7021-7025.
- 682 21. Baral PK, Wieland B, Swayampakula M, Polymenidou M, Aguzzi A, et al. (2011)  
683 Crystallization and preliminary X-ray diffraction analysis of prion protein bound to the Fab  
684 fragment of the POM1 antibody. *Acta Crystallogr Sect F Struct Biol Cryst Commun* 67:  
685 1211-1213.

- 686 22. Swayampakula M, Baral PK, Aguzzi A, Kav NN, James MN (2013) The crystal structure of an  
687 octapeptide repeat of the prion protein in complex with a Fab fragment of the POM2  
688 antibody. *Protein Sci* 22: 893-903.
- 689 23. Falsig J, Sonati T, Herrmann US, Saban D, Li B, et al. (2012) Prion pathogenesis is faithfully  
690 reproduced in cerebellar organotypic slice cultures. *PLoS Pathog* 8: e1002985.
- 691 24. Cleary JP, Walsh DM, Hofmeister JJ, Shankar GM, Kuskowski MA, et al. (2005) Natural  
692 oligomers of the amyloid-beta protein specifically disrupt cognitive function. *Nat Neurosci*  
693 8: 79-84.
- 694 25. Shankar GM, Li S, Mehta TH, Garcia-Munoz A, Shepardson NE, et al. (2008) Amyloid-beta  
695 protein dimers isolated directly from Alzheimer's brains impair synaptic plasticity and  
696 memory. *Nat Med* 14: 837-842.
- 697 26. Benilova I, Karran E, De Strooper B (2012) The toxic Abeta oligomer and Alzheimer's disease:  
698 an emperor in need of clothes. *Nat Neurosci* 15: 349-357.
- 699 27. Ow SY, Dunstan DE (2014) A brief overview of amyloids and Alzheimer's disease. *Protein Sci*  
700 23: 1315-1331.
- 701 28. Sengupta U, Nilson AN, Kaye R (2016) The Role of Amyloid-beta Oligomers in Toxicity,  
702 Propagation, and Immunotherapy. *EBioMedicine* 6: 42-49.
- 703 29. Silveira JR, Raymond GJ, Hughson AG, Race RE, Sim VL, et al. (2005) The most infectious  
704 prion protein particles. *Nature* 437: 257-261.
- 705 30. Heppner FL, Musahl C, Arrighi I, Klein MA, Rulicke T, et al. (2001) Prevention of scrapie  
706 pathogenesis by transgenic expression of anti-prion protein antibodies. *Science* 294: 178-  
707 182.
- 708 31. Reimann RR, Sonati T, Hornemann S, Herrmann US, Arand M, et al. (2016) Differential  
709 Toxicity of Antibodies to the Prion Protein. *PLoS Pathog* 12: e1005401.
- 710 32. Polymenidou M, Moos R, Scott M, Sigurdson C, Shi YZ, et al. (2008) The POM monoclonals:  
711 a comprehensive set of antibodies to non-overlapping prion protein epitopes. *PLoS One* 3:  
712 e3872.
- 713 33. Lashuel HA, Overk CR, Oueslati A, Masliah E (2013) The many faces of alpha-synuclein: from  
714 structure and toxicity to therapeutic target. *Nat Rev Neurosci* 14: 38-48.
- 715 34. Sakono M, Zako T (2010) Amyloid oligomers: formation and toxicity of Abeta oligomers.  
716 *FEBS J* 277: 1348-1358.
- 717 35. Waxman EA, Giasson BI (2009) Molecular mechanisms of alpha-synuclein neurodegeneration.  
718 *Biochim Biophys Acta* 1792: 616-624.
- 719 36. Simic G, Babic Leko M, Wray S, Harrington C, Delalle I, et al. (2016) Tau Protein  
720 Hyperphosphorylation and Aggregation in Alzheimer's Disease and Other Tauopathies, and  
721 Possible Neuroprotective Strategies. *Biomolecules* 6: 6.
- 722 37. Deleault NR, Walsh DJ, Piro JR, Wang F, Wang X, et al. (2012) Cofactor molecules maintain  
723 infectious conformation and restrict strain properties in purified prions. *Proc Natl Acad Sci*  
724 *U S A* 109: E1938-1946.
- 725 38. Mahal SP, Baker CA, Demczyk CA, Smith EW, Julius C, et al. (2007) Prion strain  
726 discrimination in cell culture: the cell panel assay. *Proc Natl Acad Sci U S A* 104: 20908-  
727 20913.
- 728 39. Falsig J, Aguzzi A (2008) The prion organotypic slice culture assay--POSCA. *Nat Protoc* 3:  
729 555-562.
- 730 40. Fischer M, Rulicke T, Raeber A, Sailer A, Moser M, et al. (1996) Prion protein (PrP) with  
731 amino-proximal deletions restoring susceptibility of PrP knockout mice to scrapie. *EMBO J*  
732 15: 1255-1264.
- 733 41. Falsig J, Julius C, Margalith I, Schwarz P, Heppner F, et al. (2008) A versatile prion replication  
734 assay in organotypic brain slices. *Nat Neurosci* 11: 109-117.

- 735 42. Qi Y, Wang JK, McMillian M, Chikaraishi DM (1997) Characterization of a CNS cell line,  
736 CAD, in which morphological differentiation is initiated by serum deprivation. *J Neurosci*  
737 17: 1217-1225.
- 738 43. Moore RC, Lee IY, Silverman GL, Harrison PM, Strome R, et al. (1999) Ataxia in prion protein  
739 (PrP)-deficient mice is associated with upregulation of the novel PrP-like protein doppel. *J*  
740 *Mol Biol* 292: 797-817.
- 741 44. Kuwahara C, Takeuchi AM, Nishimura T, Haraguchi K, Kubosaki A, et al. (1999) Prions  
742 prevent neuronal cell-line death. *Nature* 400: 225-226.
- 743 45. Engler C, Kandzia R, Marillonnet S (2008) A one pot, one step, precision cloning method with  
744 high throughput capability. *PLoS One* 3: e3647.
- 745 46. Mali P, Yang L, Esvelt KM, Aach J, Guell M, et al. (2013) RNA-guided human genome  
746 engineering via Cas9. *Science* 339: 823-826.
- 747 47. Hornemann S, Christen B, von Schroetter C, Perez DR, Wuthrich K (2009) Prion protein library  
748 of recombinant constructs for structural biology. *FEBS J* 276: 2359-2367.
- 749 48. Zahn R, von Schroetter C, Wüthrich K (1997) Human prion proteins expressed in *Escherichia*  
750 *coli* and purified by high-affinity column refolding. *FEBS Letters* 417: 400-404.

751

752

753 **Supporting information**

754 **S1 Text:** SPR analysis of scPOM-bi binding to PrP

755

756 **S1 Movie:** fully atomistic molecular dynamics simulation of 30 ns of the model of scPOM-bi in  
757 complex with one molecule mPrP.

758

759 **S2 Movie:** fully atomistic molecular dynamics simulation of 30 ns of the model of scPOM-bi in  
760 complex with two molecules mPrP.

761

762 **S1 Fig:** thermal denaturation of scPOM-bi measured by CD spectroscopy, indicating a melting  
763 temperature of 75°C

764

765 **S2 Fig:** Fluorescent micrographs of all biological replicates (A, scPOM-bi; B, POM2 IgG). Scale  
766 bar = 500  $\mu\text{m}$ .

767

768 **S3 Fig:** values of association ( $k_a$ , left) and dissociation constants ( $k_d$ , right) for scPOM1 (yellow),  
769 POM1-IgG (red) and scPOM-bi (blue) at different concentrations of PrP, measured by SPR. The  
770 dilution of PrP on the sensor chip is reported. The dissociation constant, but not the association, is  
771 affected by PrP dilution, indicating that intermolecular avidity effects are present in POM1 IgG and  
772 scPOM-bi. See S1 Text for further details.

773

774 **S4 Fig:** Representative confocal microscopy images of PrP:Ab oligomers and aggregates (scale bar  
775 = 10 $\mu\text{m}$ ). See main text (Fig 4) for quantification and methods for experimental details. Briefly,

776 complexes between recombinant mPrP and antibodies were formed *in vitro* and the material  
777 deposited on microscopy slides without centrifugation or other purification steps. Species of  
778 different size are apparent when mPrP is in complex with toxic (POM1) or non toxic antibodies.

779

780 **S5 Fig:** Precipitation assays confirmed that the toxic scPOM1:mPrP complex generates soluble  
781 oligomers containing both PrP and antibody. No soluble material was present in the complexes  
782 between mPrP and scPOM2, scPOM-bi or when scPOM-bi was added after scPOM1. See main  
783 text (Fig 4) for quantification and methods for experimental details. Briefly, after formation of the  
784 mPrP:Ab complexes *in vitro* the samples were centrifuged at 20'000 x g. The amount of mPrP and  
785 Ab present in the resulting supernatant was estimated with PAGE/Western Blot. The quantity of  
786 soluble material is reported as percentage of soluble mPrP or Ab alone, which do not precipitate or  
787 form aggregates over the observed time frame. The variability is due to the experimental set up and  
788 to the fact that we are analyzing transient, non-homogeneous species that are likely to change over  
789 time. Such variability does not affect the statistical significance of the measures.

790

791 **S6 Fig:** low concentration PK resistance assay. mPrP:Ab complexes were formed *in vitro* and  
792 2µg/mL of Proteinase K were added. The presence of PK resistance species was assessed by  
793 western blot. An increased amount of species resistant to PK was detected in the scPOM1:mPrP  
794 complexes, but only if the flexible tail was present, which correlates to toxicity and protection  
795 assays. See main text (Fig 4) for quantification and statistics.

796

797 **S7 Fig:** Generation of a stable CAD5 *Prnp*<sup>-/-</sup> cell line. (A) Design of sgRNA for CRISPR/Cas9  
798 mediated generation of CAD5 *Prnp*<sup>-/-</sup> cells. A PAM in the coding sequence of the signal peptide  
799 was chosen. (B) ELISA of 7 candidate CAD5 *Prnp*<sup>-/-</sup> clones showed similar PrP<sup>C</sup> levels compared  
800 to the established *Prnp*<sup>-/-</sup> cell line HPL (p>0.05, one-way ANOVA with Dunnett's post-hoc test, all



801 clones versus HPL), 5 of which were further assessed by PrP<sup>C</sup> western blot, confirming lack of PrP<sup>C</sup>  
802 expression (C). (D) Sanger sequencing of PCR amplified *Prnp* ORF showed n=4 different  
803 mutations in #C2 and n=2 different mutations, labelling according to (A). The splice acceptor site is  
804 unaffected in both of the constructs.

805

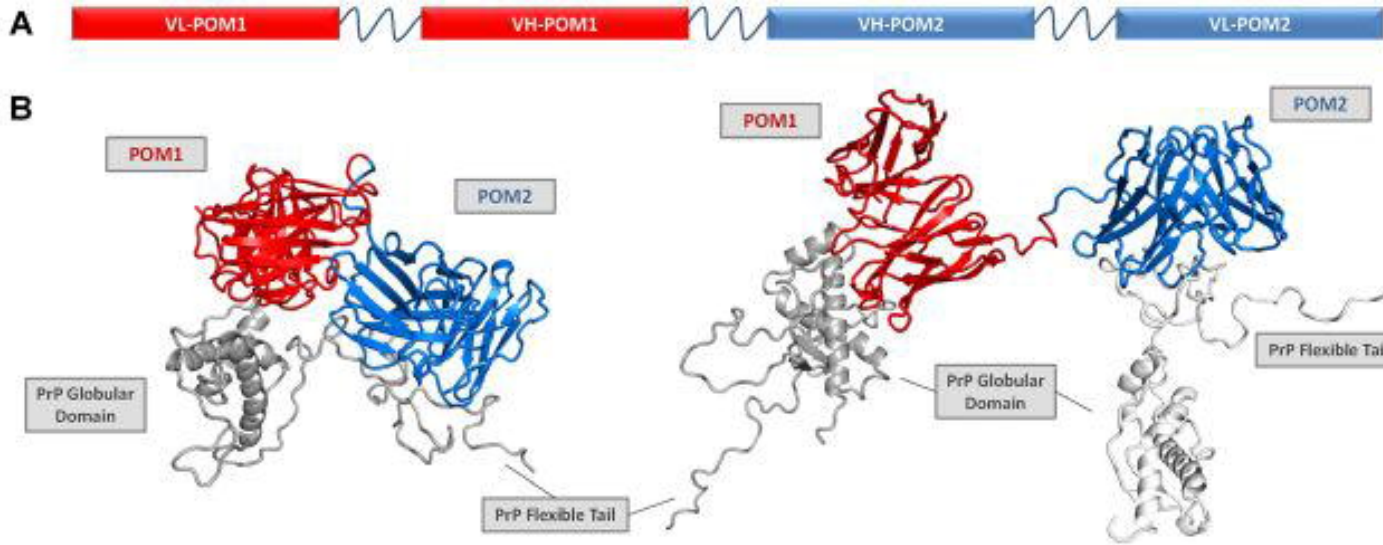

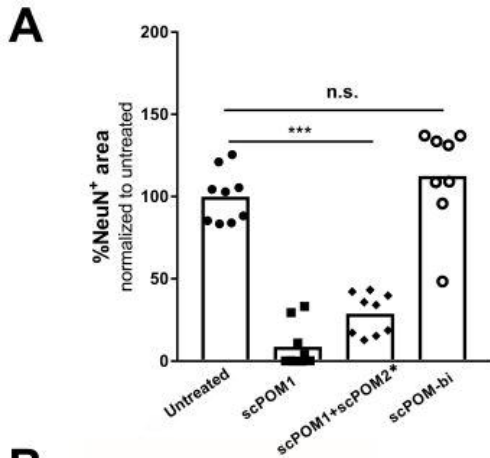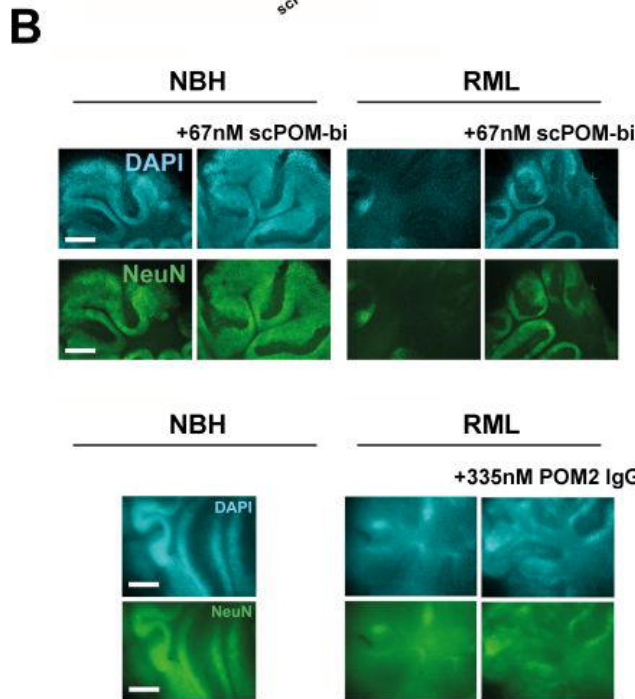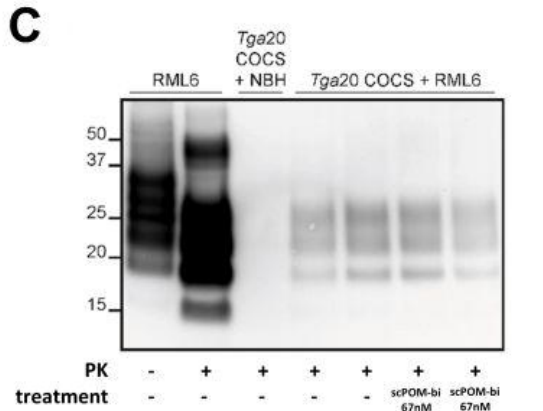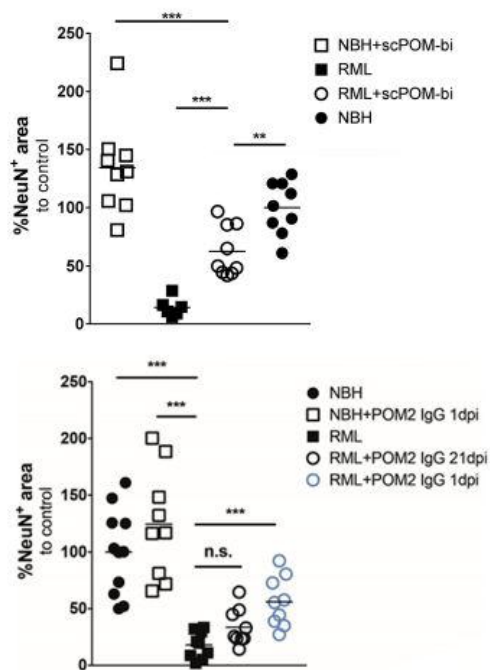

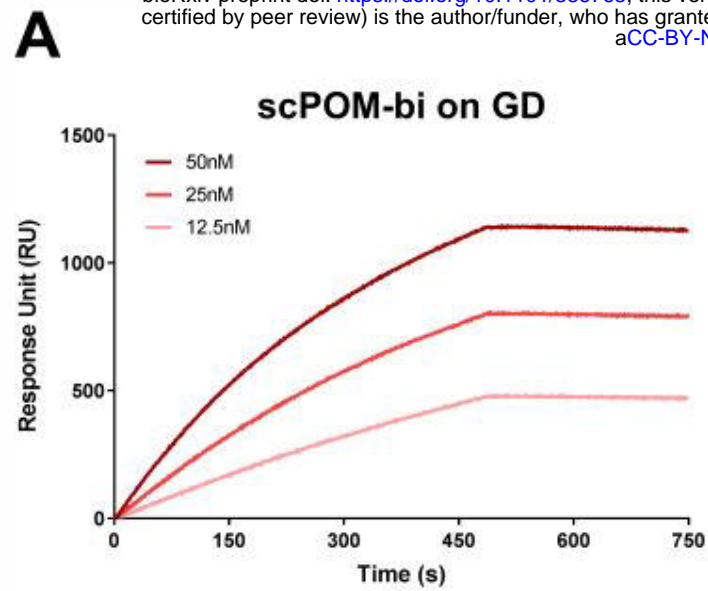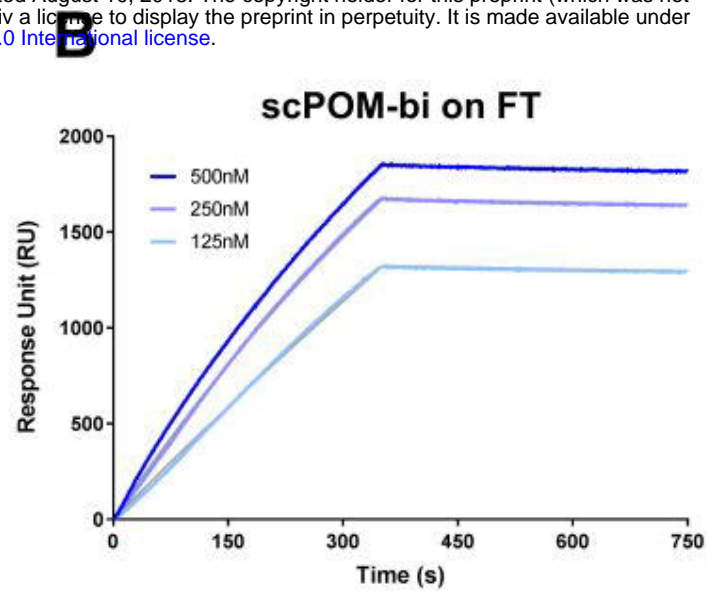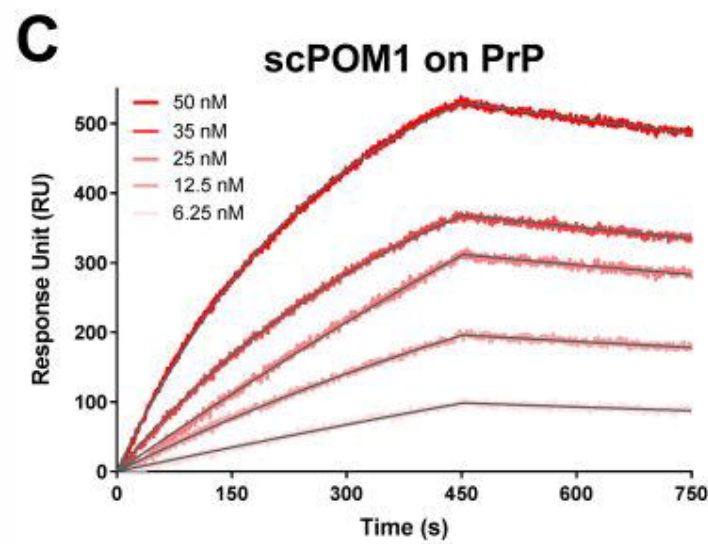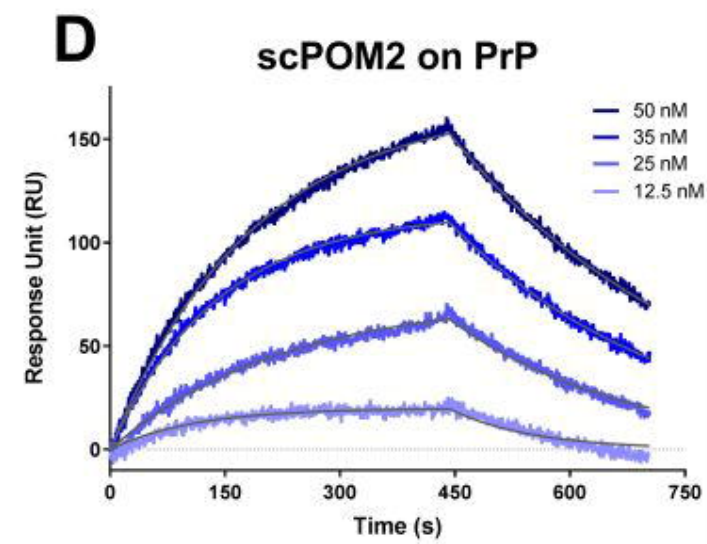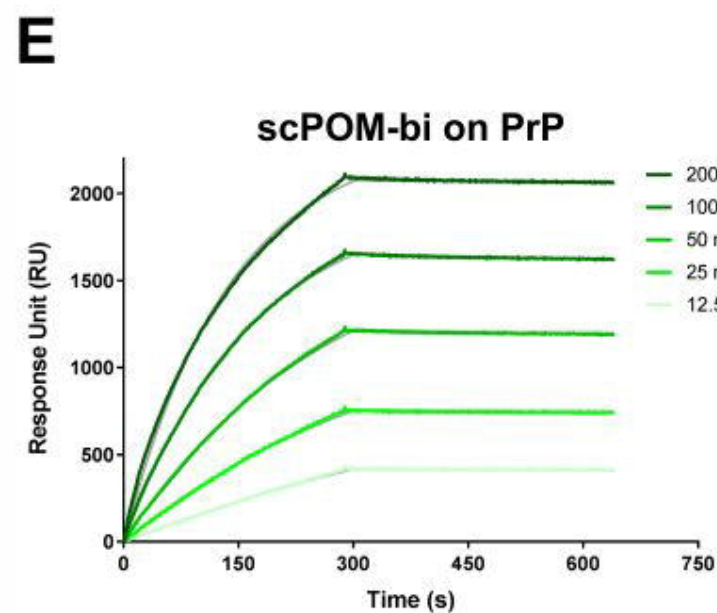

**F**

|                | $K_a$<br>(1/nMs)  | $K_d$<br>(1/s)       | KD<br>(nM) |
|----------------|-------------------|----------------------|------------|
| scPOM1         | $6.4 \times 10^4$ | $3.1 \times 10^{-4}$ | 4.8        |
| POM1-IgG       | $3.6 \times 10^5$ | $9.1 \times 10^{-5}$ | 0.5        |
| scPOM2         | $5.3 \times 10^4$ | $3.6 \times 10^{-4}$ | 23         |
| POM2-IgG       | $1.5 \times 10^5$ | $9.5 \times 10^{-6}$ | 0.1        |
| scPOM-bi       | $7.7 \times 10^4$ | $6.3 \times 10^{-5}$ | 0.8        |
| scPOM-bi on GD | $7.6 \times 10^4$ | $3.1 \times 10^{-4}$ | 3.6        |
| scPOM-bi on FT | $1.4 \times 10^4$ | $1.3 \times 10^{-4}$ | 10.7       |

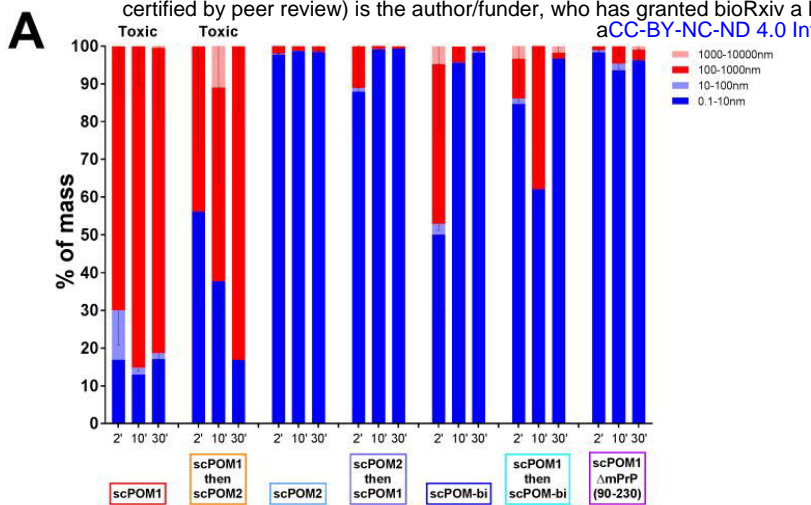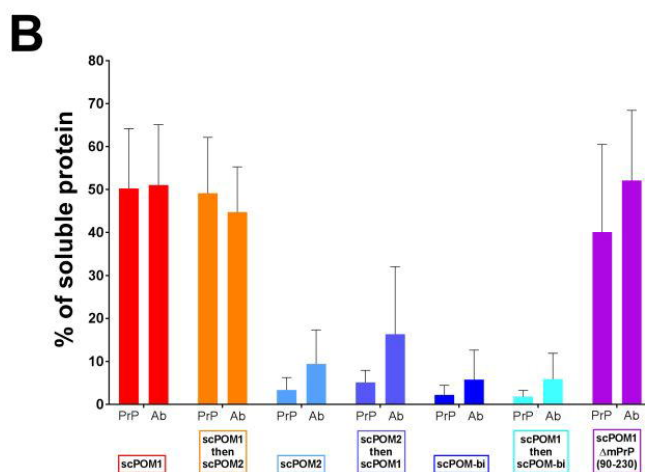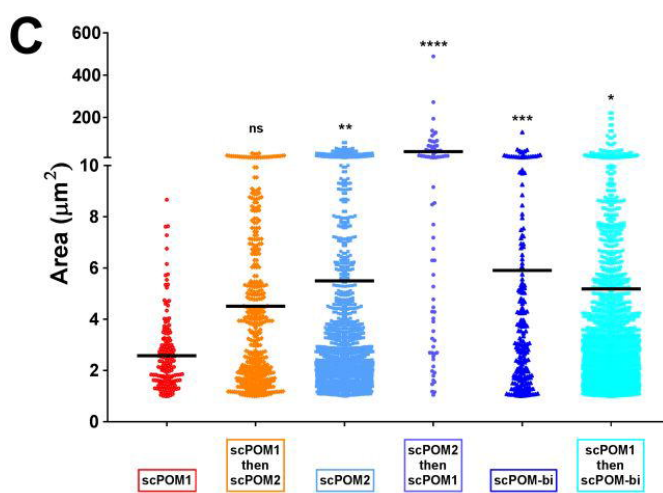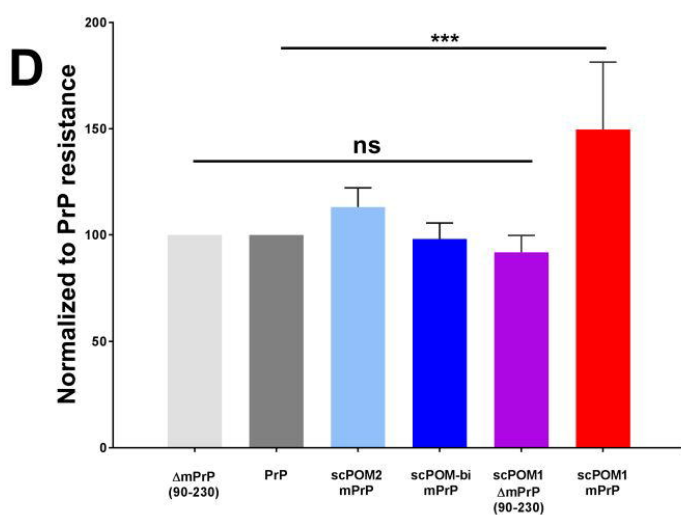

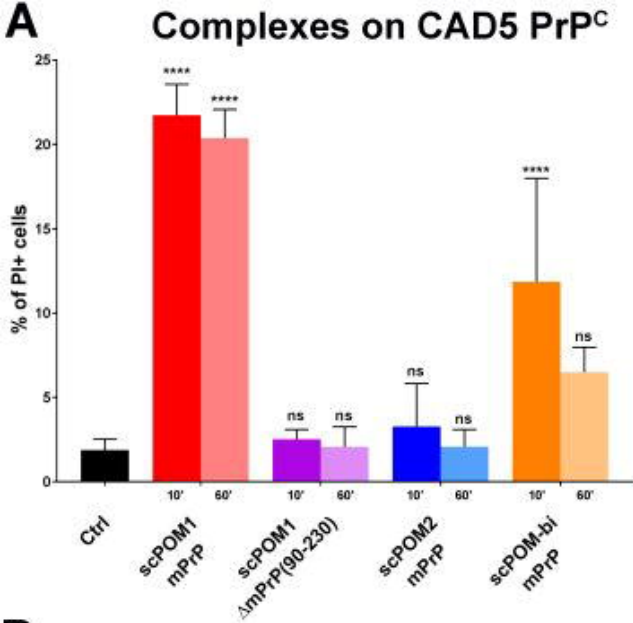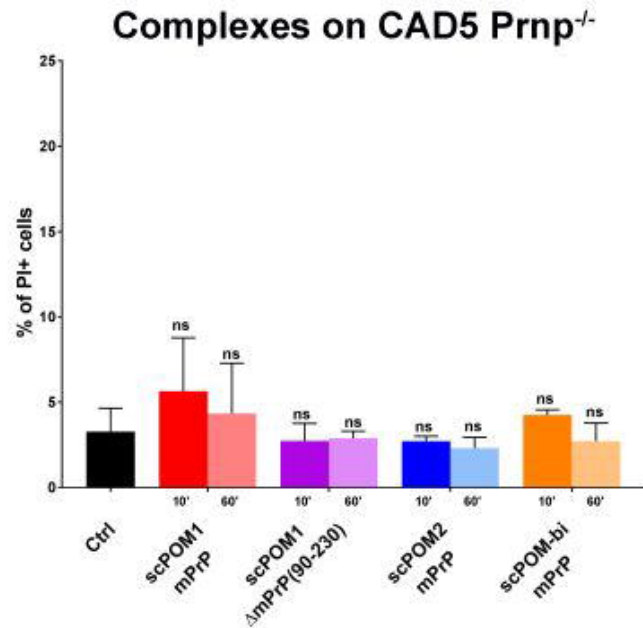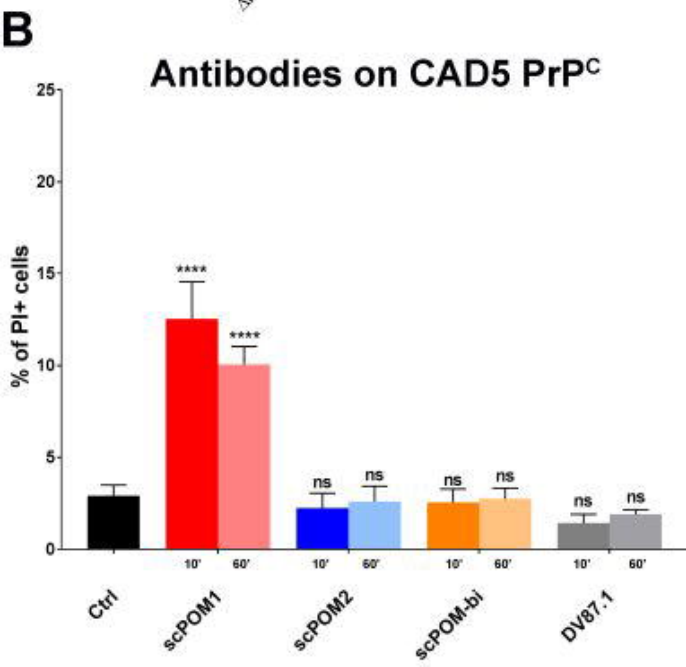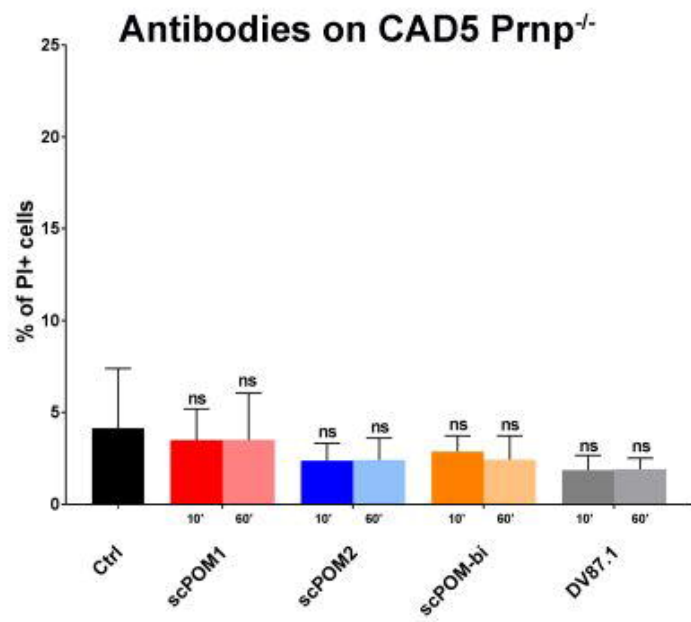

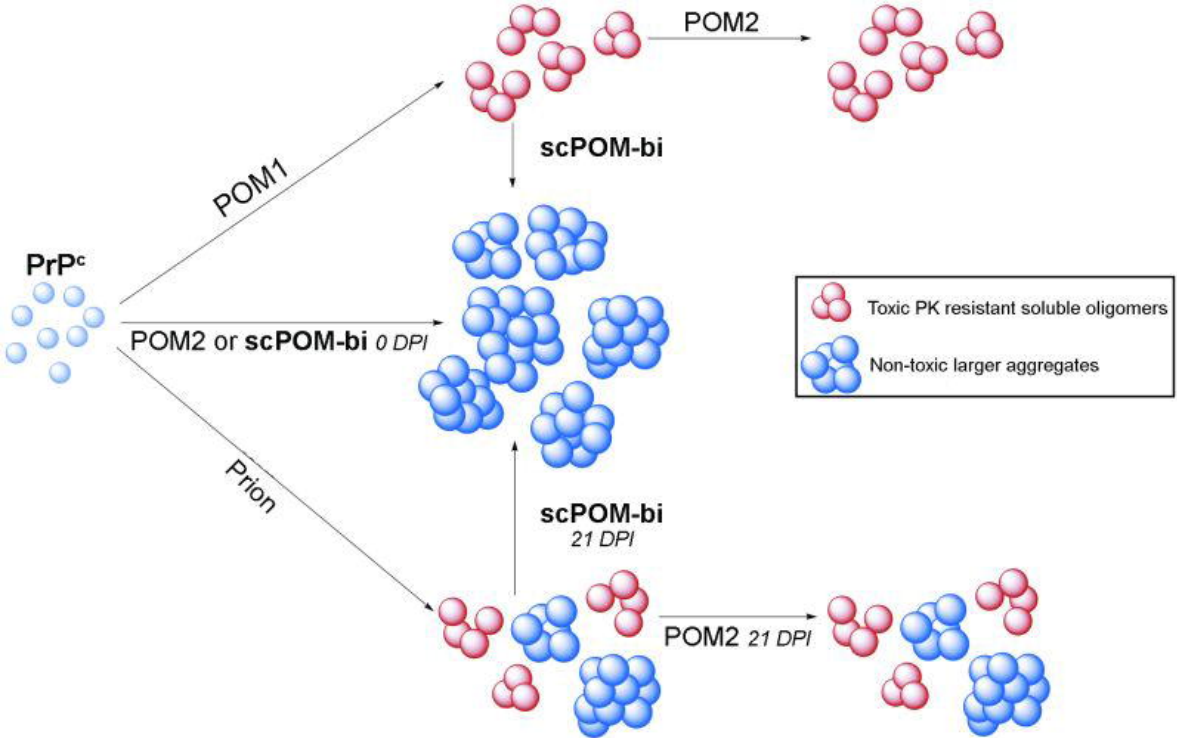

Source: https://www.biorxiv.org/content/10.1101/386763v1.full.pdf
